# Supplementary material for: Analysis of isolates from Bangladesh highlights multiple ways to carry resistance genes in Salmonella Typhi
Source: BMC Genomics. 2019 Jun 28;20:530. doi: 10.1186/s12864-019-5916-6 (PMC6599262; doi:10.1186/s12864-019-5916-6)
Supplement: Supplementary file 2 — Table S3. Ampicilin, ciprofloxacin, chloramphenicol, ceftriaxone, and cotrimoxazole resistance. (XLSX 50 kb) [file 12864_2019_5916_MOESM2_ESM.xlsx]

## Sheet: amp_resistance
Table S3. Ampicilin, ciprofloxacin, chloramphenicol, ceftriaxone, and cotrimoxazole resistance.
Isolate	Resistance	bla_tem-1	Genomic Island	Plasmids
Salmonella_311189_201186	amp-R	yes	--	pHCM1
Salmonella_311189_202186	amp-R	yes	--	pHCM1
Salmonella_311189_203186	amp-R	yes	--	pHCM1
Salmonella_311189_204186	amp-R	yes	--	pHCM1
Salmonella_311189_205186	amp-S	yes	SGI11	--
Salmonella_311189_206186	amp-R	yes	--	pHCM1
Salmonella_311189_207186	amp-R	yes	--	pHCM1
Salmonella_311189_208103	amp-S	no	--	--
Salmonella_311189_208186	amp-R	yes	--	pHCM1
Salmonella_311189_209186	amp-S	no	--	--
Salmonella_311189_210186	amp-R	yes	--	pHCM1
Salmonella_311189_211186	amp-S	no	--	--
Salmonella_311189_212186	amp-R	yes	--	pHCM1
Salmonella_311189_213186	amp-R	yes	--	pHCM1
Salmonella_311189_214186	amp-R	yes	--	pHCM1
Salmonella_311189_215186	amp-R	yes	--	pHCM1
Salmonella_311189_216103	amp-S	no	--	--
Salmonella_311189_217103	amp-S	no	--	--
Salmonella_311189_217186	amp-R	yes	--	pHCM1
Salmonella_311189_218186	amp-R	yes	--	pHCM1
Salmonella_311189_219186	amp-R	yes	--	pHCM1
Salmonella_311189_220186	amp-R	yes	--	pHCM1
Salmonella_311189_221186	amp-R	yes	--	pHCM1
Salmonella_311189_222186	amp-S	no	--	--
Salmonella_311189_223186	amp-R	yes	--	pHCM1
Salmonella_311189_224186	amp-R	yes	--	pHCM1
Salmonella_311189_231186	amp-R	yes	SGI11	--
Salmonella_311189_232103	amp-S	no	--	--
Salmonella_311189_239103	amp-S	no	--	--
Salmonella_311189_252186	amp-R	yes	--	pHCM1
Salmonella_311189_255186	amp-R	yes	SGI11	--
Salmonella_311189_256186	amp-S	no	--	--
Salmonella_311189_268103	amp-R	yes	--	pPRJEB21992
Salmonella_311189_268186	amp-R	yes	SGI11	--
Salmonella_311189_269186	amp-S	no	--	--
Salmonella_311189_282186	amp-S	no	--	--
Salmonella_311189_291186	amp-S	yes	SGI11	--
Salmonella_343076_202113	amp-S	no	--	--
Salmonella_343076_217103	amp-S	no	--	--
Salmonella_343076_227128	amp-S	no	--	--
Salmonella_343076_232188	amp-S	no	--	--
Salmonella_343076_241106	amp-S	no	--	--
Salmonella_343076_248190	amp-S	no	--	--
Salmonella_343076_249107	amp-S	yes	--	pK91
Salmonella_343076_252143	amp-R	yes	SGI11	--
Salmonella_343076_253155	amp-S	no	--	--
Salmonella_343076_269157	amp-S	no	--	--
Salmonella_343076_294172	amp-R	yes	SGI11	--
Salmonella_343077_211171	amp-R	yes	--	pK91
Salmonella_343077_212138	amp-S	no	--	--
Salmonella_343077_212159	amp-S	no	--	--
Salmonella_343077_213147	amp-S	no	--	--
Salmonella_343077_214135	amp-R	yes	--	pK91
Salmonella_343077_214162	amp-S	no	--	--
Salmonella_343077_215174	amp-R	yes	--	pK91
Salmonella_343077_228140	amp-S	no	--	--
Salmonella_343077_228157	amp-R	yes	SGI11c	--
Salmonella_343077_255118	amp-R	no	--	--
Salmonella_343077_260153	amp-R	yes	--	pK91
Salmonella_343077_267164	amp-S	no	--	--
Salmonella_343077_278127	amp-R	yes	SGI11	--
Salmonella_343077_281186	amp-S	no	--	--
Salmonella_343077_285138	amp-S	no	--	--
Salmonella_343077_286126	amp-R	yes	SGI11d	--
Salmonella_343077_292148	amp-S	no	--	--
Salmonella_343078_201101	amp-S	no	--	--
Salmonella_343078_203125	amp-R	yes	SGI11e	--
Salmonella_343078_211126	amp-S	no	--	--
Salmonella_343078_223175	amp-R	yes	--	pK91
Salmonella_343078_228140	amp-R	yes	--	pK91
Salmonella_343078_251131	amp-S	no	--	--
Salmonella_343078_256191	amp-S	no	--	--
Salmonella_343078_273110	amp-R	yes	SGI11e	--

## Sheet: cip_resistance
	gyrA				gyrB	parC		parE
Isolate	83	87	529	538	464	80	84	339	364	416	Resistance	qrnS1	Genomic Island	Plasmids	MIC
CT18	S	D	N	D	S	S	E	S	A	L	cip-S	no	--	--	--
Salmonella_311189_201186	Y	D	N	N	S	S	E	S	A	L	cip-R	no	--	--	0.25
Salmonella_311189_202186	F	D	N	D	S	S	E	S	A	L	cip-R	no	--	--	0.5
Salmonella_311189_203186	Y	D	N	N	S	S	E	S	A	L	cip-R	no	--	--	0.25
Salmonella_311189_204186	Y	D	N	N	S	S	E	S	A	L	cip-R	no	--	--	0.5
Salmonella_311189_205186	F	D	N	D	S	S	E	S	A	L	cip-R	no	--	--	0.5
Salmonella_311189_206186	Y	D	N	N	S	S	E	S	A	L	cip-R	no	--	--	0.5
Salmonella_311189_207186	Y	D	N	N	S	S	E	S	A	L	cip-R	no	--	--	0.5
Salmonella_311189_208103	F	D	N	N	S	S	E	S	A	L	cip-R	no	--	--	0.25
Salmonella_311189_208186	Y	D	N	N	S	S	E	S	A	L	cip-R	no	--	--	0.5
Salmonella_311189_209186	F	D	N	N	S	S	E	S	A	L	cip-R	no	--	--	0.25
Salmonella_311189_210186	Y	D	N	N	S	S	E	S	A	L	cip-R	no	--	--	0.5
Salmonella_311189_211186	Y	D	N	N	S	S	E	S	A	L	cip-R	no	--	--	0.5
Salmonella_311189_212186	Y	D	N	N	S	S	E	S	A	L	cip-R	no	--	--	0.5
Salmonella_311189_213186	Y	D	N	N	S	S	E	S	A	L	cip-R	no	--	--	0.5
Salmonella_311189_214186	Y	D	N	N	S	S	E	S	A	L	cip-R	no	--	--	0.5
Salmonella_311189_215186	Y	D	N	N	S	S	E	S	A	L	cip-R	no	--	--	0.5
Salmonella_311189_216103	S	D	N	D	F	S	E	S	V	L	cip-R	no	--	--	0.25
Salmonella_311189_217103	S	D	N	D	F	S	E	S	A	L	cip-S	no	--	--	0.0625
Salmonella_311189_217186	F	D	N	N	S	S	E	S	A	L	cip-R	no	--	--	1
Salmonella_311189_218186	Y	D	N	N	S	S	E	S	A	L	cip-R	no	--	--	0.5
Salmonella_311189_219186	Y	D	N	N	S	S	E	S	A	L	cip-R	no	--	--	0.5
Salmonella_311189_220186	Y	D	N	N	S	S	E	S	A	L	cip-R	no	--	--	0.25
Salmonella_311189_221186	Y	D	N	N	S	S	E	S	A	L	cip-R	no	--	--	0.5
Salmonella_311189_222186	F	D	N	D	S	S	E	S	V	L	cip-R	no	--	--	0.5
Salmonella_311189_223186	Y	D	N	N	S	S	E	S	A	L	cip-R	no	--	--	0.5
Salmonella_311189_224186	Y	D	N	N	S	S	E	S	A	L	cip-R	no	--	--	0.5
Salmonella_311189_231186	F	D	N	N	S	S	E	S	A	L	cip-R	no	--	--	0.25
Salmonella_311189_232103	S	D	N	D	F	S	E	S	A	L	cip-S	no	--	--	0.0625
Salmonella_311189_239103	S	D	N	D	S	S	E	S	A	L	cip-S	no	--	--	0.0156
Salmonella_311189_252186	Y	D	N	N	S	R	E	S	A	L	cip-R	no	--	--	1
Salmonella_311189_255186	F	G	N	N	S	S	K	S	A	L	cip-R	no	--	--	16
Salmonella_311189_256186	S	N	N	N	S	S	E	S	A	L	cip-S	no	--	--	0.0625
Salmonella_311189_268103	S	D	N	D	S	S	E	S	V	L	cip-S	no	--	--	0.0156
Salmonella_311189_268186	S	D	N	N	S	S	E	S	A	L	cip-S	no	--	--	0.0156
Salmonella_311189_269186	S	D	N	N	S	S	E	S	A	L	cip-S	no	--	--	0.0312
Salmonella_311189_282186	F	D	N	N	S	S	E	S	A	L	cip-R	no	--	--	1
Salmonella_311189_291186	F	G	N	N	S	S	K	S	A	L	cip-R	no	--	--	8
Salmonella_343076_202113	F	D	N	N	S	S	E	S	A	L	cip-R	no	--	--	1
Salmonella_343076_217103	S	D	S	D	F	S	E	S	A	L	cip-S	no	--	--	0.0625
Salmonella_343076_227128	F	D	N	N	S	S	E	S	A	L	cip-R	no	--	--	0.125
Salmonella_343076_232188	F	D	N	N	S	S	E	S	A	L	cip-R	no	--	--	0.25
Salmonella_343076_241106	S	D	S	D	F	S	E	S	A	L	cip-S	no	--	--	0.0625
Salmonella_343076_248190	S	D	S	D	F	S	E	S	A	L	cip-S	no	--	--	0.0625
Salmonella_343076_249107	Y	D	N	N	S	S	E	S	A	L	cip-R	yes	--	pK91	8
Salmonella_343076_252143	F	D	N	N	S	S	E	S	A	L	cip-R	no	--	--	0.25
Salmonella_343076_253155	S	N	N	D	S	S	E	L	V	L	cip-R	no	--	--	0.125
Salmonella_343076_269157	F	D	N	D	S	S	E	S	V	L	cip-R	no	--	--	0.125
Salmonella_343076_294172	F	D	N	N	S	S	E	S	A	L	cip-R	no	--	--	0.25
Salmonella_343077_211171	Y	D	N	N	S	S	E	S	A	L	cip-R	yes	--	pK91	4
Salmonella_343077_212138	S	D	S	D	F	S	E	S	A	L	cip-R	no	--	--	0.125
Salmonella_343077_212159	F	D	N	D	S	S	E	S	A	L	cip-R	no	--	--	0.25
Salmonella_343077_213147	F	D	N	D	S	S	E	S	V	L	cip-S	no	--	--	0.0625
Salmonella_343077_214135	Y	D	N	N	S	S	E	S	A	L	cip-R	yes	--	pK91	4
Salmonella_343077_214162	F	N	N	N	S	I	E	S	A	L	cip-R	no	--	--	8
Salmonella_343077_215174	Y	D	N	N	S	S	E	S	A	L	cip-R	yes	--	pK91	4
Salmonella_343077_228140	S	D	N	D	S	S	E	S	V	L	cip-S	no	--	--	0.0008
Salmonella_343077_228157	F	D	N	N	S	S	E	S	A	L	cip-R	no	--	--	0.25
Salmonella_343077_255118	S	D	S	D	F	S	E	S	A	L	cip-R	no	--	--	0.125
Salmonella_343077_260153	Y	D	N	N	S	S	E	S	A	L	cip-R	yes	--	pK91	4
Salmonella_343077_267164	S	D	S	D	F	S	E	S	A	L	cip-S	no	--	--	0.0625
Salmonella_343077_278127	F	D	N	N	S	S	E	S	A	L	cip-R	no	--	--	0.25
Salmonella_343077_281186	F	D	N	D	S	S	E	S	A	L	cip-R	no	--	--	0.125
Salmonella_343077_285138	F	D	N	N	S	S	E	S	A	L	cip-S	no	--	--	0.0156
Salmonella_343077_286126	F	D	N	N	S	S	E	S	A	L	cip-R	no	--	--	0.25
Salmonella_343077_292148	F	D	N	N	S	S	E	S	A	F	cip-R	no	--	--	0.5
Salmonella_343078_201101	Y	D	N	N	S	S	E	S	A	L	cip-R	no	--	--	1
Salmonella_343078_203125	Y	D	N	N	S	S	E	S	A	L	cip-R	no	--	--	0.5
Salmonella_343078_211126	F	D	N	N	S	S	E	S	A	L	cip-R	no	--	--	4
Salmonella_343078_223175	Y	D	N	N	S	S	E	S	A	L	cip-R	yes	--	pK91	4
Salmonella_343078_228140	Y	D	N	N	S	S	E	S	A	L	cip-R	yes	--	pK91	4
Salmonella_343078_251131	F	D	N	N	S	S	E	S	A	L	cip-R	no	--	--	0.25
Salmonella_343078_256191	F	D	N	D	S	S	E	S	A	L	cip-R	no	--	--	0.25
Salmonella_343078_273110	Y	D	N	N	S	S	E	S	A	L	cip-R	no	--	--	0.125

## Sheet: chl_resistance
Isolate	Resistance	catA1	Genomic Island	Plasmids
Salmonella_311189_201186	chl-R	yes	--	pHCM1
Salmonella_311189_202186	chl-R	yes	--	pHCM1
Salmonella_311189_203186	chl-R	yes	--	pHCM1
Salmonella_311189_204186	chl-R	yes	--	pHCM1
Salmonella_311189_205186	chl-S	yes	SGI11	--
Salmonella_311189_206186	chl-R	yes	--	pHCM1
Salmonella_311189_207186	chl-R	yes	--	pHCM1
Salmonella_311189_208103	chl-S	no	--	--
Salmonella_311189_208186	chl-R	yes	--	pHCM1
Salmonella_311189_209186	chl-S	no	--	--
Salmonella_311189_210186	chl-R	yes	--	pHCM1
Salmonella_311189_211186	chl-S	no	--	--
Salmonella_311189_212186	chl-R	yes	--	pHCM1
Salmonella_311189_213186	chl-R	yes	--	pHCM1
Salmonella_311189_214186	chl-R	yes	--	pHCM1
Salmonella_311189_215186	chl-R	yes	--	pHCM1
Salmonella_311189_216103	chl-S	no	--	--
Salmonella_311189_217103	chl-S	no	--	--
Salmonella_311189_217186	chl-R	yes	--	pHCM1
Salmonella_311189_218186	chl-R	yes	--	pHCM1
Salmonella_311189_219186	chl-R	yes	--	pHCM1
Salmonella_311189_220186	chl-R	yes	--	pHCM1
Salmonella_311189_221186	chl-R	yes	--	pHCM1
Salmonella_311189_222186	chl-S	no	--	--
Salmonella_311189_223186	chl-R	yes	--	pHCM1
Salmonella_311189_224186	chl-R	yes	--	pHCM1
Salmonella_311189_231186	chl-R	yes	SGI11	--
Salmonella_311189_232103	chl-S	no	--	--
Salmonella_311189_239103	chl-S	no	--	--
Salmonella_311189_252186	chl-R	yes	--	pHCM1
Salmonella_311189_255186	chl-R	yes	SGI11	--
Salmonella_311189_256186	chl-R	yes	SGI11b	--
Salmonella_311189_268103	chl-S	no	--	--
Salmonella_311189_268186	chl-R	yes	SGI11	--
Salmonella_311189_269186	chl-S	no	--	--
Salmonella_311189_282186	chl-R	yes	SGI11b	--
Salmonella_311189_291186	chl-R	yes	SGI11	--
Salmonella_343076_202113	chl-R	yes	SGI11b	--
Salmonella_343076_217103	chl-S	no	--	--
Salmonella_343076_227128	chl-R	yes	SGI11b	--
Salmonella_343076_232188	chl-R	yes	SGI11b	--
Salmonella_343076_241106	chl-S	no	--	--
Salmonella_343076_248190	chl-S	no	--	--
Salmonella_343076_249107	chl-S	no	--	--
Salmonella_343076_252143	chl-R	yes	SGI11	--
Salmonella_343076_253155	chl-S	no	--	--
Salmonella_343076_269157	chl-S	no	--	--
Salmonella_343076_294172	chl-R	yes	SGI11	--
Salmonella_343077_211171	chl-S	no	--	--
Salmonella_343077_212138	chl-S	no	--	--
Salmonella_343077_212159	chl-S	no	--	--
Salmonella_343077_213147	chl-S	no	--	--
Salmonella_343077_214135	chl-S	no	--	--
Salmonella_343077_214162	chl-S	no	--	--
Salmonella_343077_215174	chl-S	no	--	--
Salmonella_343077_228140	chl-S	no	--	--
Salmonella_343077_228157	chl-S	no	--	--
Salmonella_343077_255118	chl-R	no	--	--
Salmonella_343077_260153	chl-S	no	--	--
Salmonella_343077_267164	chl-S	no	--	--
Salmonella_343077_278127	chl-R	yes	SGI11	--
Salmonella_343077_281186	chl-S	no	--	--
Salmonella_343077_285138	chl-R	yes	SGI11b	--
Salmonella_343077_286126	chl-S	no	--	--
Salmonella_343077_292148	chl-R	yes	SGI11b	--
Salmonella_343078_201101	chl-S	no	--	--
Salmonella_343078_203125	chl-R	yes	SGI11e	--
Salmonella_343078_211126	chl-R	yes	SGI11b	--
Salmonella_343078_223175	chl-S	no	--	--
Salmonella_343078_228140	chl-S	no	--	--
Salmonella_343078_251131	chl-R	yes	SGI11b	--
Salmonella_343078_256191	chl-S	no	--	--
Salmonella_343078_273110	chl-R	yes	SGI11e	--

## Sheet: cro_resistance
Isolate	Resistance	bla_CTX-M-15	Genomic Island	Plasmids
Salmonella_311189_201186	cro-S	no	--	--
Salmonella_311189_202186	cro-S	no	--	--
Salmonella_311189_203186	cro-S	no	--	--
Salmonella_311189_204186	cro-S	no	--	--
Salmonella_311189_205186	cro-S	no	--	--
Salmonella_311189_206186	cro-S	no	--	--
Salmonella_311189_207186	cro-S	no	--	--
Salmonella_311189_208103	cro-S	no	--	--
Salmonella_311189_208186	cro-S	no	--	--
Salmonella_311189_209186	cro-S	no	--	--
Salmonella_311189_210186	cro-S	no	--	--
Salmonella_311189_211186	cro-S	no	--	--
Salmonella_311189_212186	cro-S	no	--	--
Salmonella_311189_213186	cro-S	no	--	--
Salmonella_311189_214186	cro-S	no	--	--
Salmonella_311189_215186	cro-S	no	--	--
Salmonella_311189_216103	cro-S	no	--	--
Salmonella_311189_217103	cro-S	no	--	--
Salmonella_311189_217186	cro-S	no	--	--
Salmonella_311189_218186	cro-S	no	--	--
Salmonella_311189_219186	cro-S	no	--	--
Salmonella_311189_220186	cro-S	no	--	--
Salmonella_311189_221186	cro-S	no	--	--
Salmonella_311189_222186	cro-S	no	--	--
Salmonella_311189_223186	cro-S	no	--	--
Salmonella_311189_224186	cro-S	no	--	--
Salmonella_311189_231186	cro-S	no	--	--
Salmonella_311189_232103	cro-S	no	--	--
Salmonella_311189_239103	cro-S	no	--	--
Salmonella_311189_252186	cro-S	no	--	--
Salmonella_311189_255186	cro-S	no	--	--
Salmonella_311189_256186	cro-S	no	--	--
Salmonella_311189_268103	cro-R	yes	--	pPRJEB21992
Salmonella_311189_268186	cro-S	no	--	--
Salmonella_311189_269186	cro-S	no	--	--
Salmonella_311189_282186	cro-S	no	--	--
Salmonella_311189_291186	cro-S	no	--	--
Salmonella_343076_202113	cro-S	no	--	--
Salmonella_343076_217103	cro-S	no	--	--
Salmonella_343076_227128	cro-S	no	--	--
Salmonella_343076_232188	cro-S	no	--	--
Salmonella_343076_241106	cro-S	no	--	--
Salmonella_343076_248190	cro-S	no	--	--
Salmonella_343076_249107	cro-S	no	--	--
Salmonella_343076_252143	cro-S	no	--	--
Salmonella_343076_253155	cro-S	no	--	--
Salmonella_343076_269157	cro-S	no	--	--
Salmonella_343076_294172	cro-S	no	--	--
Salmonella_343077_211171	cro-S	no	--	--
Salmonella_343077_212138	cro-S	no	--	--
Salmonella_343077_212159	cro-S	no	--	--
Salmonella_343077_213147	cro-S	no	--	--
Salmonella_343077_214135	cro-S	no	--	--
Salmonella_343077_214162	cro-S	no	--	--
Salmonella_343077_215174	cro-S	no	--	--
Salmonella_343077_228140	cro-S	no	--	--
Salmonella_343077_228157	cro-S	no	--	--
Salmonella_343077_255118	cro-S	no	--	--
Salmonella_343077_260153	cro-S	no	--	--
Salmonella_343077_267164	cro-S	no	--	--
Salmonella_343077_278127	cro-S	no	--	--
Salmonella_343077_281186	cro-S	no	--	--
Salmonella_343077_285138	cro-S	no	--	--
Salmonella_343077_286126	cro-S	no	--	--
Salmonella_343077_292148	cro-S	no	--	--
Salmonella_343078_201101	cro-S	no	--	--
Salmonella_343078_203125	cro-S	no	--	--
Salmonella_343078_211126	cro-S	no	--	--
Salmonella_343078_223175	cro-S	no	--	--
Salmonella_343078_228140	cro-S	no	--	--
Salmonella_343078_251131	cro-S	no	--	--
Salmonella_343078_256191	cro-S	no	--	--
Salmonella_343078_273110	cro-S	no	--	--

## Sheet: sxt_resistance
Isolate	Resistance	dfrA7	sul1	sul2	Genomic Island	Plasmids
Salmonella_311189_201186	sxt-R	yes	yes	yes	--	pHCM1
Salmonella_311189_202186	sxt-R	yes	yes	yes	--	pHCM1
Salmonella_311189_203186	sxt-R	yes	yes	yes	--	pHCM1
Salmonella_311189_204186	sxt-R	yes	yes	yes	--	pHCM1
Salmonella_311189_206186	sxt-R	yes	yes	yes	--	pHCM1
Salmonella_311189_207186	sxt-R	yes	yes	yes	--	pHCM1
Salmonella_311189_208186	sxt-R	yes	yes	yes	--	pHCM1
Salmonella_311189_210186	sxt-R	yes	yes	yes	--	pHCM1
Salmonella_311189_212186	sxt-R	yes	yes	yes	--	pHCM1
Salmonella_311189_213186	sxt-R	yes	yes	yes	--	pHCM1
Salmonella_311189_214186	sxt-R	yes	yes	yes	--	pHCM1
Salmonella_311189_215186	sxt-R	yes	yes	yes	--	pHCM1
Salmonella_311189_217186	sxt-R	yes	yes	yes	--	pHCM1
Salmonella_311189_218186	sxt-R	yes	yes	yes	--	pHCM1
Salmonella_311189_219186	sxt-R	yes	yes	yes	--	pHCM1
Salmonella_311189_220186	sxt-R	yes	yes	yes	--	pHCM1
Salmonella_311189_221186	sxt-R	yes	yes	yes	--	pHCM1
Salmonella_311189_223186	sxt-R	yes	yes	yes	--	pHCM1
Salmonella_311189_224186	sxt-R	yes	yes	yes	--	pHCM1
Salmonella_311189_231186	sxt-R	yes	yes	yes	SGI11	--
Salmonella_311189_252186	sxt-R	yes	yes	yes	--	pHCM1
Salmonella_311189_255186	sxt-R	yes	yes	yes	SGI11	--
Salmonella_311189_256186	sxt-R	yes	yes	no	SGI11b	--
Salmonella_311189_268186	sxt-R	yes	yes	yes	SGI11	--
Salmonella_311189_291186	sxt-R	yes	yes	yes	SGI11	--
Salmonella_343076_202113	sxt-R	yes	yes	no	SGI11b	--
Salmonella_343076_227128	sxt-R	yes	yes	no	SGI11b	--
Salmonella_343076_232188	sxt-R	yes	yes	no	SGI11b	--
Salmonella_343076_252143	sxt-R	yes	yes	yes	SGI11	--
Salmonella_343076_294172	sxt-R	yes	yes	yes	SGI11	--
Salmonella_343077_228157	sxt-R	yes	yes	yes	SGI11c	--
Salmonella_343077_255118	sxt-R	no	no	no	--	--
Salmonella_343077_278127	sxt-R	yes	yes	yes	SGI11	--
Salmonella_343077_292148	sxt-R	yes	yes	no	SGI11b	--
Salmonella_343078_251131	sxt-R	yes	yes	no	SGI11b	--
Salmonella_311189_205186	sxt-S	yes	yes	yes	SGI11	--
Salmonella_311189_208103	sxt-S	no	no	no	--	--
Salmonella_311189_209186	sxt-S	no	no	no	--	--
Salmonella_311189_211186	sxt-S	no	no	no	--	--
Salmonella_311189_216103	sxt-S	no	no	no	--	--
Salmonella_311189_217103	sxt-S	no	no	no	--	--
Salmonella_311189_222186	sxt-S	no	no	no	--	--
Salmonella_311189_232103	sxt-S	no	no	no	--	--
Salmonella_311189_239103	sxt-S	no	no	no	--	--
Salmonella_311189_268103	sxt-S	no	no	no	--	--
Salmonella_311189_269186	sxt-S	no	no	no	--	--
Salmonella_311189_282186	sxt-S	yes	yes	no	SGI11b	--
Salmonella_343076_217103	sxt-S	no	no	no	--	--
Salmonella_343076_241106	sxt-S	no	no	no	--	--
Salmonella_343076_248190	sxt-S	no	no	no	--	--
Salmonella_343076_249107	sxt-S	no	no	yes	--	pK91
Salmonella_343076_253155	sxt-S	no	no	no	--	--
Salmonella_343076_269157	sxt-S	no	no	no	--	--
Salmonella_343077_211171	sxt-S	no	no	yes	--	pK91
Salmonella_343077_212138	sxt-S	no	no	no	--	--
Salmonella_343077_212159	sxt-S	no	no	no	--	--
Salmonella_343077_213147	sxt-S	no	no	no	--	--
Salmonella_343077_214135	sxt-S	no	no	yes	--	pK91
Salmonella_343077_214162	sxt-S	no	no	no	--	--
Salmonella_343077_215174	sxt-S	no	no	yes	--	pK91
Salmonella_343077_228140	sxt-S	no	no	no	--	--
Salmonella_343077_260153	sxt-S	no	no	yes	--	pK91
Salmonella_343077_267164	sxt-S	no	no	no	--	--
Salmonella_343077_281186	sxt-S	no	no	no	--	--
Salmonella_343077_285138	sxt-S	yes	yes	no	SGI11b	--
Salmonella_343077_286126	sxt-S	no	no	yes	SGI11d	--
Salmonella_343078_201101	sxt-S	no	no	no	--	--
Salmonella_343078_203125	sxt-S	yes	yes	no	SGI11e	--
Salmonella_343078_211126	sxt-S	yes	yes	no	SGI11b	--
Salmonella_343078_223175	sxt-S	no	no	yes	--	pK91
Salmonella_343078_228140	sxt-S	no	no	yes	--	pK91
Salmonella_343078_256191	sxt-S	no	no	no	--	--
Salmonella_343078_273110	sxt-S	yes	yes	no	SGI11e	--

## Sheet: Isolate_Lineage_Plasmid_Islands
Sample_name	MLST type	Genotype	H58-lineage	Resistance plasmids	Non-resistance plasmids	SGI11
311189_201186	1	4.3.1	Bd (except Bdq)	pHCM1	no	no
311189_202186	2	Not available	Not available	pHCM1	no	no
311189_203186	1	4.3.1	Bd (except Bdq)	pHCM1	no	no
311189_204186	1	4.3.1	Bd (except Bdq)	pHCM1	no	no
311189_205186	2	Not available	Not available	no	pHCM2	SGI11
311189_206186	1	4.3.1	Bd (except Bdq)	pHCM1	no	no
311189_207186	1	4.3.1	Bd (except Bdq)	pHCM1	no	no
311189_208103	1	4.3.1	Ia	no	no	no
311189_208186	1	4.3.1	Bd (except Bdq)	pHCM1	no	no
311189_209186	1	4.3.1	Ia	no	no	no
311189_210186	1	4.3.1	Bd (except Bdq)	pHCM1	no	no
311189_211186	1	4.3.1	Undefined	no	no	no
311189_212186	1	4.3.1	Bd (except Bdq)	pHCM1	no	no
311189_213186	1	4.3.1	Bd (except Bdq)	pHCM1	no	no
311189_214186	1	4.3.1	Bd (except Bdq)	pHCM1	no	no
311189_215186	1	4.3.1	Bd (except Bdq)	pHCM1	no	no
311189_216103	2	3.3	NA	no	pHCM2	no
311189_217103	2209	2.3.3	NA	no	no	no
311189_217186	1	4.3.1	Ia	pHCM1	pHCM2	no
311189_218186	1	4.3.1	Bd (except Bdq)	pHCM1	no	no
311189_219186	1	4.3.1	Bd (except Bdq)	pHCM1	no	no
311189_220186	1	4.3.1	Bd (except Bdq)	pHCM1	no	no
311189_221186	1	4.3.1	Bd (except Bdq)	pHCM1	no	no
311189_222186	2	3.3	NA	no	no	no
311189_223186	1	4.3.1	Bd (except Bdq)	pHCM1	no	no
311189_224186	1	4.3.1	Bd (except Bdq)	pHCM1	no	no
311189_231186	1	4.3.1	Ia	no	no	SGI11
311189_232103	2209	2.3.3	NA	no	no	no
311189_239103	2209	2.3.3	NA	no	no	no
311189_252186	1	4.3.1	Bd (except Bdq)	pHCM1	no	no
311189_255186	1	4.3.1	Ia	no	no	SGI11
311189_256186	1	4.3.1	Ia	no	no	SGI11b
311189_268103	2	3.3	NA	pK88/ pPRJEB21992	no	no
311189_268186	1	4.3.1	Ia	no	pHCM2	SGI11
311189_269186	1	4.3.1	Ia	no	no	no
311189_282186	1	4.3.1	Ia	no	pHCM2	SGI11b
311189_291186	1	4.3.1	Ia	no	no	SGI11
343076_202113	1	4.3.1	Ia	no	pHCM2	SGI11b
343076_217103	2	2	NA	no	no	no
343076_227128	1	4.3.1	Ia	no	pHCM2	SGI11b
343076_232188	1	4.3.1	Ia	no	pHCM2	SGI11b
343076_241106	2	2	NA	no	no	no
343076_248190	2	2	NA	no	no	no
343076_249107	1	4.3.1	Bdq	pK91	no	no
343076_252143	1	4.3.1	Ia	no	pHCM2	SGI11
343076_253155	2	3.3	NA	no	pHCM2	no
343076_269157	2	3.3	NA	no	no	no
343076_294172	1	4.3.1	Ia	no	pHCM2	SGI11
343077_211171	1	4.3.1	Bdq	pK91	no	no
343077_212138	2	2	NA	no	no	no
343077_212159	2	3.2.2	NA	no	no	no
343077_213147	2	3.3	NA	no	pHCM2	no
343077_214135	1	4.3.1	Bdq	pK91	no	no
343077_214162	1	4.3.1	II	no	no	no
343077_215174	1	4.3.1	Bdq	pK91	no	no
343077_228140	2	3.3	NA	no	pHCM2	no
343077_228157	1	4.3.1	Ia	no	pHCM2	SGI11c
343077_255118	2	2	NA	no	no	no
343077_260153	1	4.3.1	Bdq	pK91	no	no
343077_267164	2	2	NA	no	no	no
343077_278127	1	4.3.1	Ia	no	no	SGI11
343077_281186	2	3.2.2	NA	no	pK43	no
343077_285138	1	4.3.1	Ia	no	pHCM2	SGI11b
343077_286126	1	4.3.1	Ia	no	pHCM2	SGI11d
343077_292148	1	4.3.1	Ia	no	no	SGI11b
343078_201101	1	4.3.1	Bd (except Bdq)	no	no	no
343078_203125	1	4.3.1	Ia	no	pHCM2	SGI11e
343078_211126	1	Not available	Not available	no	pHCM2	SGI11b
343078_223175	1	4.3.1	Bdq	pK91	no	no
343078_228140	1	4.3.1	Bdq	pK91	no	no
343078_251131	1	4.3.1	Ia	no	pHCM2	SGI11b
343078_256191	2	3.2.2	NA	no	no	no
343078_273110	1	4.3.1	Ia	no	pHCM2	SGI11e
